# Supplementary material
Source: Springer Nature journal article supplement (https://www.springermedizin.de/resource/supplementary/12885_2005_440_MOESM2_ESM.pdf/9470166)

## Breast tissues

## Uterine tissues

## Ovarian tissues

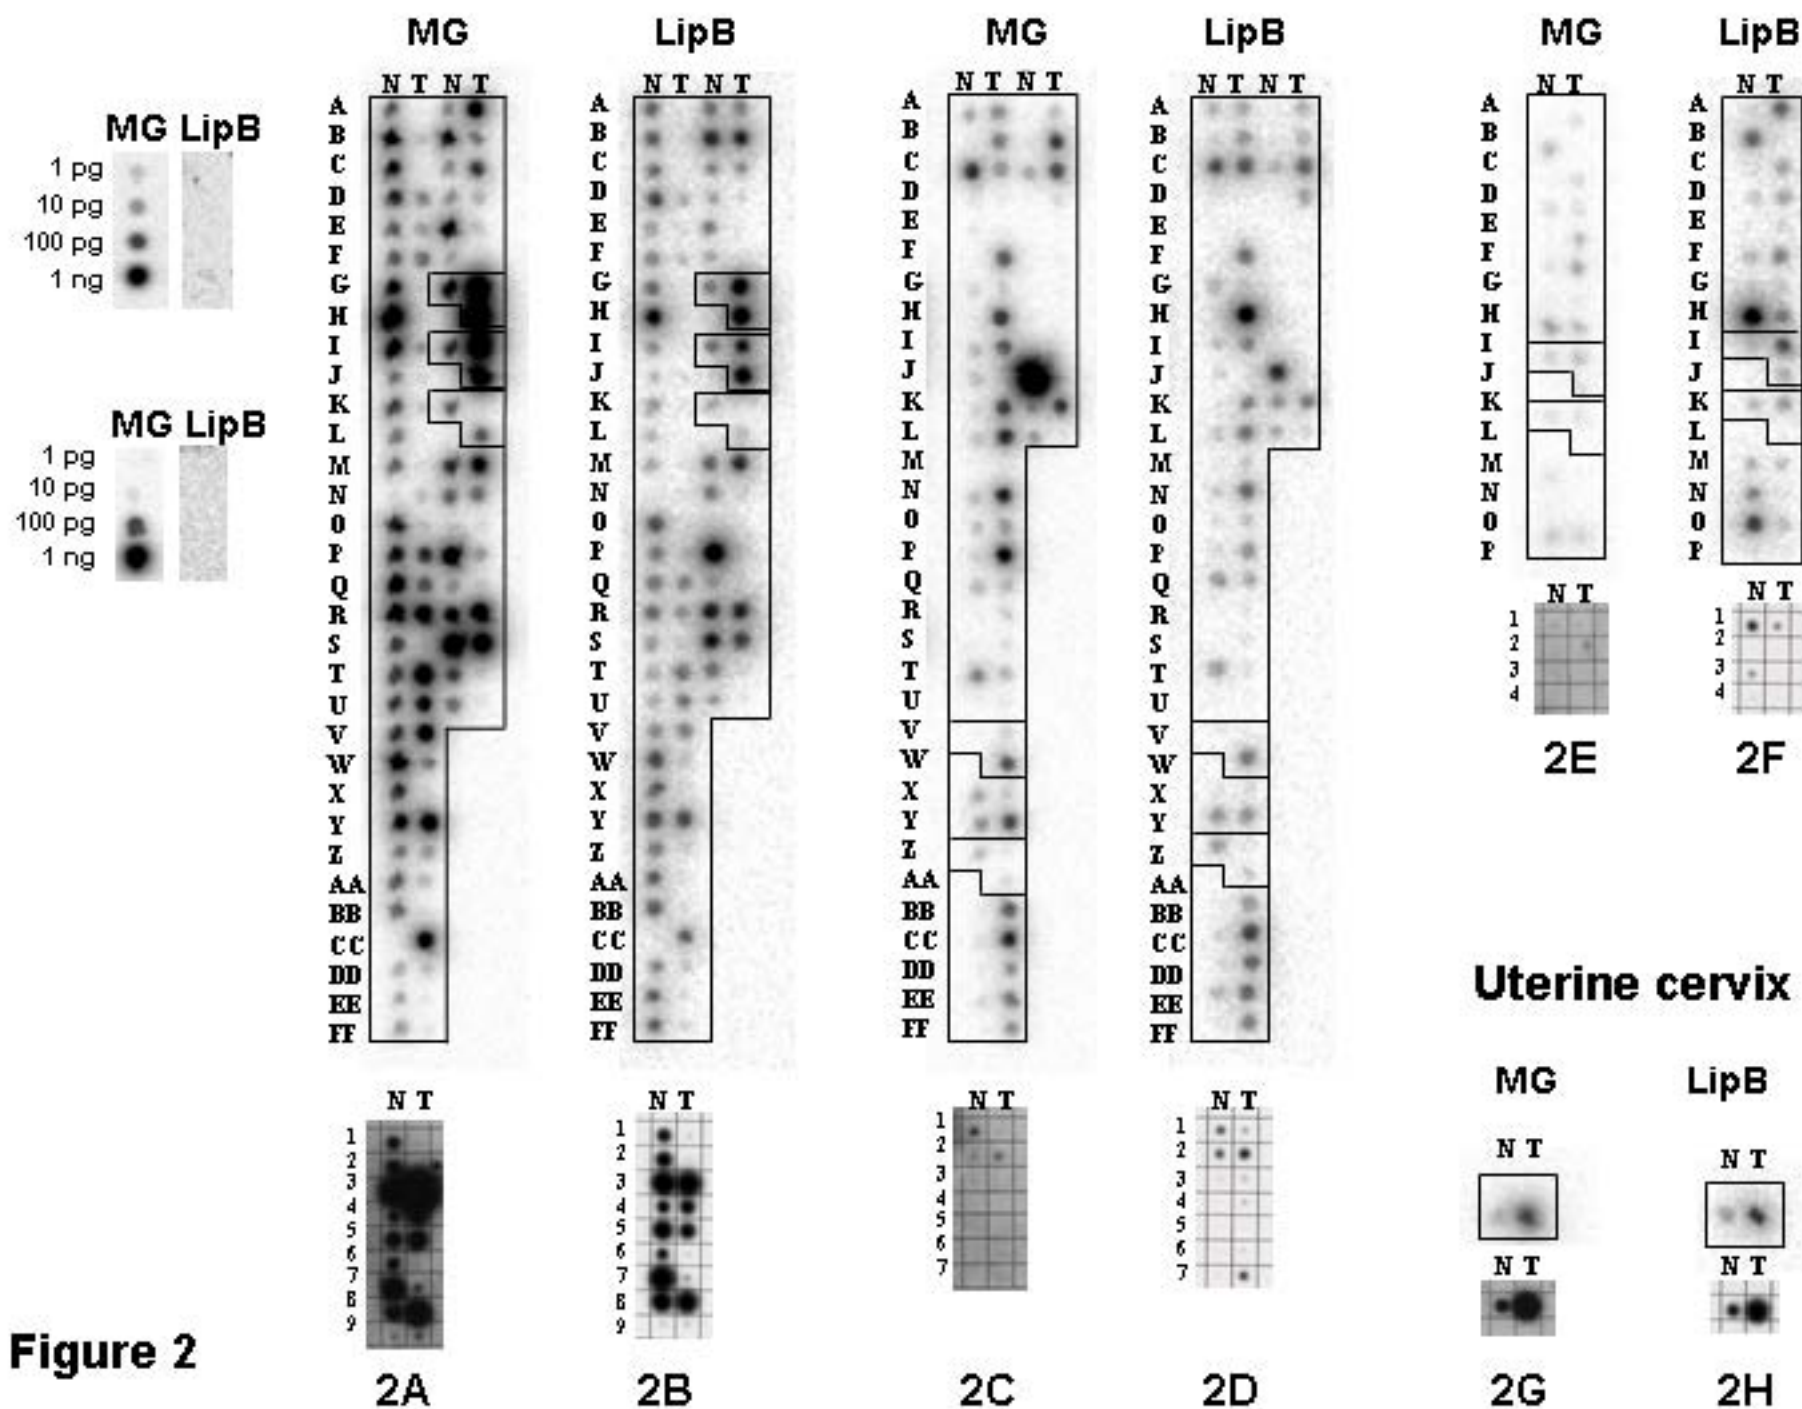

**Figure 2**

Supplement: MOESM2 [file 9470166]
